# Supplementary material
Source: PubMed Central journal article supplement (PMC5710797)
Supplement: NIHMS918352-supplement-Supplemental_Figures.pdf [file NIHMS918352-supplement-Supplemental_Figures.pdf]

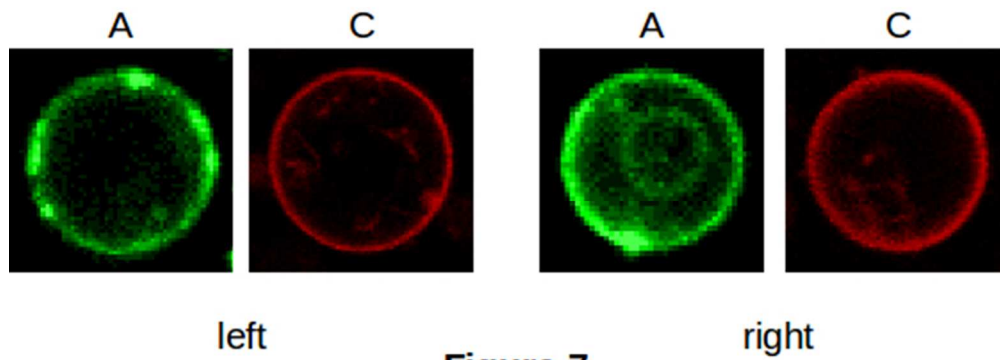

**Figure 7**

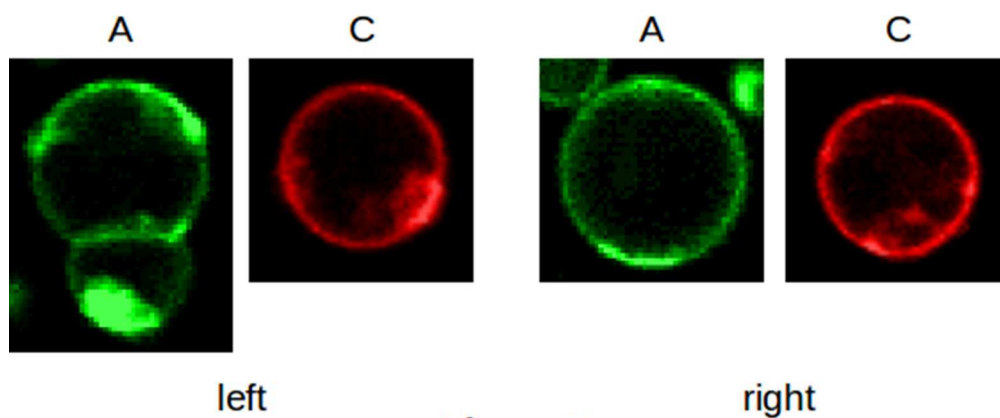

**Figure 8**

### Daptomycin Intrinsic Fluorescence

Kynurenine emission upon Tryptophan excitation at 280 nm

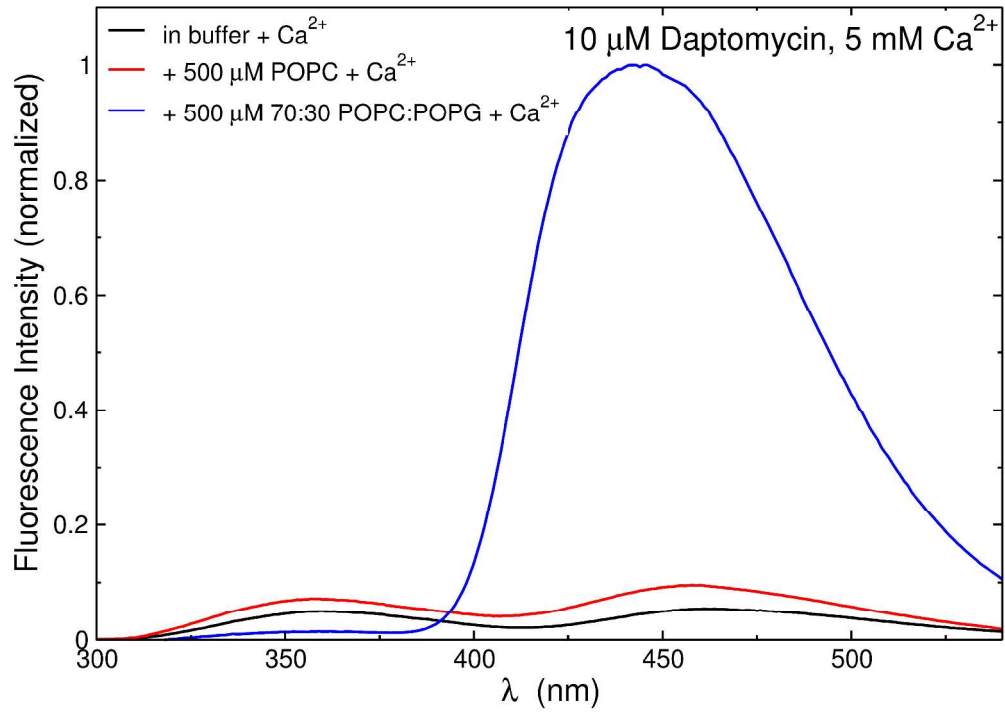

82x66mm (1200 x 1200 DPI)
